# Tissue-specific delivery system via AFF-1-coated pseudotyped Vesicular Stomatitis Virus in *C. elegans*

Anna Meledin<sup>1</sup>, Xiaohui Li<sup>1</sup>, Elena Matveev<sup>1</sup>, Boaz Gildor<sup>1</sup>, Ofer Katzir<sup>1</sup> and Benjamin Podbilewicz<sup>1\*</sup>

<sup>1</sup>Department of Biology, Technion- Israel Institute of Technology, Haifa, 32000, Israel

\*Correspondence to: [podbilew@technion.ac.il](mailto:podbilew@technion.ac.il)

Running title: Fusexin-coated pseudovirus infection in *C. elegans*

## Summary:

- AFF-1-coated virus infects skin cells and rarely muscle cells in *C. elegans*
- Epithelial cell-specific infection requires *eff-1* activity
- Pseudoviral infection depends on the amount of *eff-1* in target cells
- Ectopic EFF-1 in muscle cells induces their fusion and viral infection

**Keywords:** AFF-1, *Caenorhabditis elegans*, cell-cell fusion, EFF-1, fusexins, fusion proteins, muscle fusion, tissue/cell-specific delivery, vesicular stomatitis virus, virus-based vehicles

## Graphical abstract:



## Abstract

Viral-based vectors are widely used for fundamental and translational research; however, production of a tissue-specific targeting vector is often a challenging step. Here, we develop a cell type-specific delivery system, based on vesicular stomatitis virus lacking the viral fusion protein (fusogen) and pseudotyped with AFF-1, a *C. elegans* cell-to-cell bilateral fusogen from the fusexin family. Following injection of AFF-1-coated virus into the *C. elegans* pseudocoelom that functions as a circulatory system, we observe specific infection of different cells that express EFF-1 or AFF-1 fusogens. EFF-1-expressing epidermal cells are preferentially infected, whereas mononucleated body wall muscles (BWMs) that do not express any fusogen are rarely infected. The epidermal cells infection is abolished when the host cells do not express EFF-1, while ectopic expression of EFF-1 on BWMs induces their abnormal cell-cell fusion, produces paralyzed-dumpy animals and enhances muscle infection by AFF-1-coated viruses. Thus, our data uncover that AFF-1-coated pseudotyped viruses can be retargeted to desired cells in a controlled manner and serve as a cell-specific delivery system in nematodes with potential applications in regenerative processes, therapies such as dendritic reconnection following injuries, and studies of diverse cellular and viral fusogens.

## Introduction

Vesicular Stomatitis Virus (VSV) is an enveloped negative strand RNA rhabdovirus. VSV utilizes its surface glycoprotein G (VSV-G) to infect vertebrates and invertebrates and lyses many cell lines tested to date [1–3]. VSV is widely used for pseudotyping other viruses and has a high transduction efficiency [1–4]. These properties turned VSV $\Delta$ G into a promising vector for gene therapy, tissue regeneration, viral-based oncolysis, and VSV-based vaccines, some of which successfully completed phase III clinical trials [1,5]. Moreover, VSV-based vectors are useful for studying mechanisms of transcription and replication of RNA viruses, cellular trafficking, antiviral responses and fusion proteins (fusogens) [6–9]. However, the major bottleneck for both applied and fundamental research purposes is achieving an efficient and specific targeting of VSV-based vectors into desired cells/tissues of a live, multicellular organism [3]. Like other viruses, VSV lacks specificity for desired target cells as it suggestively enters cells through highly ubiquitous receptors such as the LDL receptor [10]. Retargeting VSV into particular tissues of interest therefore requires blocking the virus' natural interactions providing new, cell-specific interactions. Indeed, mutation or substitution of VSV-G with glycoproteins from other viruses or chimeric glycoproteins coupled with antibodies can retarget VSV to specific cells [3,4,11–13].

VSV-G is a class III viral fusogen whereas the *Caenorhabditis elegans* EFF-1 and AFF-1, which fuse somatic cells during development, are structural homologs of class II viral proteins and gamete HAP2(GCS1) fusogens from the fusexin family [14–22]. EFF-1 and AFF-1 also participate in maintaining neuronal architecture and neuronal reconnection following injury [23–27]. Studied viral glycoproteins, including VSV-G, use a unilateral fusion mechanism that depends on the expression of receptors only on the target cells [28,29]. In contrast, EFF-1 and AFF-1 are bilateral fusogens- their presence is required on the membranes of both apposing cells to mediate fusion [6,16,18,30,31]. These two fusogens can act in either a homotypic or a heterotypic manner [6,16,18,21] and mediate heterotypic cell fusion of Sf9 insect and Baby Hamster Kidney (BHK) cells [6,16]. Finally, VSV viruses containing a GFP substituting the VSV-G coding sequence (VSVΔG) [32,33] that are coated with AFF-1 (VSVΔG-AFF-1) specifically infect AFF-1 or EFF-1 expressing BHK cells [6]. Thus, in contrast to the pseudotyped virus coated with the native, unilateral G glycoprotein (VSVΔG-G), infection by VSVΔG-AFF-1 requires fusogen expression on the host cell membrane. To date, however, VSVΔG coated with AFF-1, EFF-1 or any other non-viral fusogen have not been tested for infection in a living organism so far. Recently VSVΔG-G was demonstrated to infect living *C. elegans* [7,34]. Given that: (i) VSVΔG-AFF-1 requires a fusogen on the target cell for infection, (ii) a detailed cellular atlas of AFF-1 and EFF-1 expression and function in *C. elegans* is available and (iii) *C. elegans* *eff-1* and *aff-1* mutants are available, we test whether VSVΔG-AFF-1 can be exploited as a cell-specific delivery system in *C. elegans*. We find that AFF-1-coated viruses infect *C. elegans* and specifically target cells that express functional EFF-1 or AFF-1. Moreover, this infection increases with the dosage of active *eff-1* conditionally expressed in the worm. Furthermore, AFF-1-coated pseudoviruses can be redirected to mononucleated BWMs that ectopically express EFF-1 inducing their merger to form non-functional syncytial muscle fibers. Therefore, VSVΔG-AFF-1 can serve as a cell-specific, inducible delivery system in *C. elegans*. Based on our results, we suggest additional applications for VSVΔG-AFF-1 including finding new fusogens and fusogen-expressing tissues, studying fusogen-fusogen interactions and fusogen-interacting proteins *in vivo*, studying neuronal regeneration processes and using specific cell-delivery approaches for other viruses such as coronaviruses and retroviruses in different organisms.



### Figure 1. VSVΔG-AFF-1 and VSVΔG-G have different tropisms

**(A)** BHK cells expressing AFF-1 (red pins) were infected with VSVΔG-G. The viral genome encodes GFP replacing VSV-G (white pins). GFP(+) (green), infected cells. VSVΔG-AFF-1 pseudoviruses were harvested from the supernatant, titrated and microinjected into *C. elegans*. **(B-F)** Confocal Z-stack projections of *drh-1* worms injected with VSVΔG-G (2300-16000 IU) or VSVΔG-AFF-1 (33-240 IU) and imaged 48-72 h later (VSVΔG-G, n=65; VSVΔG-AFF-1, n=46 from 5 and 6 independent experiments respectively). Images and their insets are dot boxed. Arrowheads, hypodermal (HYP) nuclei. Arrows, infected cell. BWM-Body Wall Muscle, UM-Uterine Muscle, SM-Stomatointestinal Muscle, EC-Excretory Cell, P-Pharynx. Scale bars, 50 μm. **(G)** Distribution of worms with specified infected, GFP(+) cell types. **(H)** Fraction of GFP(+) worms injected with indicated IU of VSVΔG-G or VSVΔG-AFF-1. Each dot represents an independent experiment (n=10-28 worms per experiment).  $R^2$  and the IU doses producing 50% GFP(+) worms (ID<sub>50</sub>) are indicated. See also Figure S1.

## Results

### VSV $\Delta$ G-AFF-1 and VSV $\Delta$ G-G infect different cells in *C. elegans*

Wildtype, recombinant or pseudotyped VSV has been shown to infect rodents, fish, farm animals, and primates [1,35–37]. Recently, VSV $\Delta$ G-G was shown to infect *C. elegans* [7]. Previously, pseudotyped VSV expressing the *C. elegans* somatic fusogen AFF-1 (VSV $\Delta$ G-AFF-1) was shown to infect AFF-1 or EFF-1 expressing BHK cells [6], but was not tested in a living organism. To test whether pseudotyped VSV $\Delta$ G-AFF-1 [6,33,38] can infect *C. elegans*, we prepared a recombinant VSV strain encoding the fluorescent reporter GFP, coated by AFF-1 fusion protein (VSV $\Delta$ G-AFF-1). Briefly, BHK cells expressing AFF-1 were infected with VSV $\Delta$ G-G helper virus (Fig. 1A). Newly generated virions were coated by plasma membrane-bound AFF-1, thereby producing VSV $\Delta$ G-AFF-1 pseudotyped viruses. Then, we titered the viruses determining the number of viral Infective Units (IU)/ml in BHK-AFF-1 cells. Finally, VSV $\Delta$ G-AFF-1 viruses were injected into worm's pseudocoelom; a body cavity filled with fluid that surrounds the internal organs. We expected that virus injected into the pseudocoelom will encounter different cells inside the worm (Figure 1A). Worms were injected with VSV $\Delta$ G-AFF-1 that was pre-incubated with  $\alpha$ VSV-G antibody (see materials and methods and Figure S4), VSV $\Delta$ G-G (as a positive control) or DMEM medium (as negative control). We used *drh-1(-)* (Dicer Related Helicase -1) mutant worms, as they are more susceptible to VSV infection and do not have any observable phenotypes [7,34]. Taken that VSV-G works unilaterally, while AFF-1 and EFF-1 fusogens have to be present in both fusing membranes [6,16,18,30], we hypothesized that VSV $\Delta$ G-G and VSV $\Delta$ G-AFF-1 will produce different infection patterns. Hence, we characterized and compared the GFP positive (GFP(+)) cells infected by VSV $\Delta$ G-G or VSV $\Delta$ G-AFF-1. In agreement with previous results, VSV $\Delta$ G-G preferentially infected muscle cells [7], including BWM, uterine muscles (UM) and stomatointestinal muscles (SM, Figures 1B and 1C). VSV $\Delta$ G-G also infected the epidermal cells (hypodermis, HYP), excretory canal cell (EC, Figure 1B), glia and neurons in the head (Figures S1A-S1C). In contrast, VSV $\Delta$ G-AFF-1 infected HYP cells (Figure 1D), excretory cell (Figure 1E) pharyngeal muscles (P) (Figure 1D), Body Wall Muscles (BWM) (Figure 1F) and head neurons and glia (Figures S1D-S1F). VSV $\Delta$ G-G mostly infects muscles that do not express any known fusogen (67% of infected, GFP(+) worms had only BWM infection), whereas VSV $\Delta$ G-AFF-1 mainly infects the EFF-1-expressing hypodermis (61% of GFP(+) worms had only hyp infection) (Figure 1G). Moreover, the calculated ID50 (infection dose producing 50% GFP(+) worms) for VSV $\Delta$ G-G and VSV $\Delta$ G-AFF-1 were approximately 1000 and 20 IU respectively (Figure 1H). Therefore, VSV $\Delta$ G-AFF-1, a virus pseudotyped with a bilateral fusogen, can efficiently infect a multicellular organism such as *C. elegans*. Moreover, VSV $\Delta$ G-AFF-1 and VSV $\Delta$ G-G are specialized for different cellular targets and have different infectivity levels.



**Figure 2. VSVΔG-AFF-1 requires EFF-1 on target cells for infection**

(A-C) Confocal Z-stack projections of *C. elegans* infected with VSVΔG-AFF-1 (33-240 IU) and imaged 48 h later. *drh-1* (n=46), *drh-1;eff-1(-)* (n=15) and *drh-1;aff-1(-)* (n=10).

(D) Fraction of GFP(+) worms from (A-C).

(E-H) Confocal Z-stack projections of *C. elegans* infected with VSVΔG-G (2300-4700 IU) 48 h postinjection. *drh-1* (n=56), *drh-1;eff-1(-)* (n=39) or *drh-1;aff-1(-)* (n=15).

(I) Fraction of GFP(+) worms from (E-H).

Arrowheads, HYP nuclei. Arrows, infected cell. See Figure 1 for cell types. Scale bars, 100 μm. Error bars represent mean±SEM. \*p<0.05, \*\*\*p<0.001 (Student's t-test). See also Figure S2.

## VSV $\Delta$ G-AFF-1 requires EFF-1 in host cells for infection

We showed that cells infected by VSV $\Delta$ G-AFF-1 included hypodermis, excretory cell, neurons in the head, glia and pharyngeal cells. It is known that in adults pharyngeal cells, head neurons, glia and hypodermal cells express EFF-1 [14], while pharyngeal cells, excretory duct cell and glia express AFF-1 [18,21] and lastly, excretory cell, head neurons, hypodermal cells and pharyngeal cells express EFF-2, a recent duplication of EFF-1 with unknown function (BG, Oren-Suissa and BP unpublished data). Importantly, BWM cells that do not express any known fusogen in *C. elegans* were infected by VSV $\Delta$ G-AFF-1 in only 9% of the worms compared to 67% of the worms infected with VSV $\Delta$ G-G (Figure 1G). These findings suggest that similarly to cell culture studies [6], infection of living *C. elegans* by VSV $\Delta$ G-AFF-1 follows a bilateral action mechanism, and that VSV $\Delta$ G-AFF-1 is capable of interacting with several members of the fusexin family on the target cell. Therefore, we hypothesized that EFF-1-expressing hypodermal cells could not be infected by VSV $\Delta$ G-AFF-1 in the absence of EFF-1, while cells expressing AFF-1 or EFF-2 would still be targeted. To test this hypothesis, we injected either VSV $\Delta$ G-G or VSV $\Delta$ G-AFF-1 into the pseudocoelom of wt, null *eff-1(ok1021)* mutants (*eff-1(-)*;[14]), null *aff-1(tm2214)* mutants (*aff-1(-)*;[18]) or putative null *eff-2(hy51)* (*eff-2(-)*; see materials and methods) worms, and quantified the percentage of worms with GFP(+) cells. We detected VSV $\Delta$ G-AFF-1 infected hypodermal cells in *eff-1(+)* (Figure 2A) but not in *eff-1(-)* worms (Figure 2B), while GFP(+) excretory and glia cell were detected even in the absence of EFF-1 (Figure 2B). *aff-1(-)* worms had GFP(+) hypodermal cells as in wildtype (Figure 2C). Overall, the fraction of worms showing VSV $\Delta$ G-AFF-1-infected hypodermal cells was similarly high in wildtype and in *aff-1(-)* (87% and 92% for wt and *aff-1(-)*), respectively) but was absent in *eff-1(-)* mutants (Figure 2D). In addition, muscles were inefficiently infected in wildtype and *aff-1(-)* mutants, and not infected in *eff-1(-)* animals (Figure 2D). The fraction of worms with GFP(+) excretory cells was not significantly different in all backgrounds (Figure 2D). Finally, the fraction of worms with GFP(+) glia/neuron cells was significantly higher in *eff-1(-)*, compared to wt and *aff-1(-)* animals (Figures S1D-S1F). Moreover, *eff-2(-)* and wildtype animals were similarly infected in their hypodermal, muscle and excretory cells (Figure S2). These results show that VSV $\Delta$ G-AFF-1 requires EFF-1 expressed on hypodermal cells, for their infection. Moreover, we show evidence for AFF-1-EFF-1 bilateral heterotypic interactions *in vivo*.

EFF-1 mediates formation of hyp7 syncytium by fusing 139 hypodermal cells during embryonic and larval development and *eff-1(-)* worms have mononucleated hypodermal cells instead of this syncytium [14]. To exclude the possibility that hypodermal cells of *eff-1(-)* worms have a reduced susceptibility to viral infection, we injected wt, *aff-1(-)* and *eff-1(-)* worms with VSV $\Delta$ G-G. We found that wild-type worms injected with VSV $\Delta$ G-G, presented a full body-length

covered by infected hypodermal cells along with muscles and excretory cells (Figures 2E-2F), while *eff-1(-)* worms had only few GFP(+) hyp nuclei localized closer to the injection region-the head, as well as muscles and excretory cells (Figure 2G). *aff-1(-)* worms had hypodermal infection similar to wt animals (Figure 2H). Yet, the fraction of worms injected with VSV $\Delta$ G-G that showed GFP(+) muscle and hypodermal cells was not significantly different in wt, *eff-1(-)* and *aff-1(-)* backgrounds (Figure 2I). Finally, we observed a small fraction of worms with GFP(+) glia/neurons in the head with no significant difference between all tested backgrounds (Figures S1A-S1C). Thus, hypodermal cells are not compromised for VSV $\Delta$ G-G infection even in the absence of EFF-1. In addition, VSV $\Delta$ G-G with its unilateral viral fusogen infects different cells including muscles, hypodermis, excretory cell, and glia/neurons in an EFF-1- and AFF-1-independent manner. This is in contrast to VSV $\Delta$ G-AFF-1 that uses a bilateral mechanism and infects cells that normally express EFF-1 or AFF-1 in adult animals.

### **VSV $\Delta$ G-AFF-1-mediated infection depends on *eff-1* activity in target cells**

We have shown VSV $\Delta$ G-AFF-1 fails to infect hypodermal cells in *eff-1(-)* animals (Figure 2). To study whether conditional induction of *eff-1* can trigger infection by VSV $\Delta$ G-AFF-1 we varied the dosage of *eff-1* using temperature shifts in a conditional temperature sensitive (ts) mutant [14,25]. In *eff-1(hy21ts)* animals grown at the permissive 15°C, most epidermal cells fuse to form multinucleated hypodermis and vulva [14]. However, when *eff-1(hy21)* animals are grown at the restrictive 25°C, epidermal cells fail to fuse, producing phenotypes similar to the null *eff-1(ok1021)* worms [16]. Therefore, *eff-1(ts)* worms can serve as a temperature inducible system for modification of EFF-1 dosage *in vivo* [14,19,25]. To obtain varying expression of EFF-1, we maintained *eff-1(ts)* animals at 15°C, 25°C or performed 25°C to 15°C downshifts at different developmental stages and then injected VSV $\Delta$ G-AFF-1 into young adult worms (Figure 3A). Wildtype worms in all experimental conditions had GFP(+) hyp nuclei spanning the worm's body from head to tail (Figures 3B-3E), while *eff-1(ts)* animals maintained at the restrictive temperature and then shifted down from 25°C to 15°C, had a gradual increase in infected GFP(+) hyp cells (Figures 3F-3I). In wt worms maintained in all conditions, the number of GFP(+) hypodermal nuclei was about 69, consistent with the number of hyp7 nuclei found on one side of the animals body [39,40]. In contrast, for *eff-1(ts)*, the longer time the worms developed at the permissive temperature (15°C), the more GFP(+) hyp nuclei were scored (Figure 3J). Thus, hypodermal infection by VSV $\Delta$ G-AFF-1 increases with conditional induction of *eff-1*.



### Figure 3. Infection by VSVΔG-AFF-1 increases with induction of EFF-1 function

**(A)** Wt or temperature sensitive *eff-1(ts)* animals were maintained at permissive (15°C) or restrictive (25°C) temperatures for different times during their development. Each row represents a different experimental condition. Blue needles indicate virus injection. L2, Larval stage 2; L3, Larval stage 3.

**(B-I)** Confocal Z-stack projections of worms infected with VSVΔG-AFF-1. *drh-1* or *drh-1;eff-1(ts)* animals were injected with VSVΔG-AFF-1 (7-125 IU) as adults, and imaged 48 h later. Arrowheads, HYP nuclei. Asterisks, patches of GFP(-) surrounded by GFP(+) hypodermal cells. Scale bar, 100 μm.

**(J)** Quantitation of experiments. Error bars average ± SEM. Student t-test. \**p*<0.05, \*\**p*<0.001. *n*=3-10 worms per condition. Triangle, dosage of *eff-1*.

### **Ectopic EFF-1 expression in BWMs produces dumpy and uncoordinated worms**

We demonstrated that VSV $\Delta$ G-AFF-1 specifically infects EFF-1 expressing cells and rarely infects muscle cells. In addition, EFF-1-dependent infection could be induced by EFF-1(ts) conditional expression in target cells (Figure 3). Hence, we propose that ectopic EFF-1 expression in host cells, such as body wall muscles (BWMs), could retarget VSV $\Delta$ G-AFF-1 into these cells. *C. elegans* has 95 mononucleated rhomboid BWMs, arranged as staggered pairs and bundled in four quadrants that run along the worm's body [41–43]. While most vertebrates and invertebrates have syncytial striated muscles composed of long multinucleated myofibers, in *C. elegans* and other nematodes the BWMs have not been described to fuse and do not form multinucleated myofibers (<https://www.wormatlas.org/hermaphrodite/muscleintro/MusIntroframeset.html>). Therefore, we hypothesized that EFF-1 expression in BWMs can induce their ectopic fusion, alter their structure, produce muscle-related phenotypes and increase VSV $\Delta$ G-AFF-1 infection of BWMs. First, we monitored animals with an extra-chromosomal array containing genomic EFF-1 under the muscle-specific *myosin-3* promoter (*myo-3p::EFF-1*), together with *myo-3p::mCherry* which labels cytoplasm and nuclei in BWMs, enteric, gonadal and vulval muscles. Most adult animals, including *myo-3p::mCherry* (+) and (-), were wild-type-like (Table S1, Figures 4A-4B and Movie S1), while about 10% of animals were both *myo-3p::mCherry*(+) and had an uncoordinated and dumpy (Unc+Dpy) phenotype (Table S1, Figures 4C-4D and Movie S1). Most *myo-3p::mCherry*(+), Unc+Dpy animals arrested during larval development (Table S1) with additional phenotypes including bridged BWMs behind the terminal bulb (0/12 wt-like worms and 9/15 Unc+Dpy worms), mCherry-labeled aggregates that could be observed with DIC (0/12 wt-like worms and 9/15 Unc+Dpy worms) (Figures 4E-4H), *myo-3p::mCherry*(+) BWMs with clustered nuclei (3/12 wt-like worms and 9/15 Unc+Dpy worms) and elevated number of nuclei/ BWM cell ( $1.4\pm 0.2$  and  $2.2\pm 0.3$  nuclei/BWM cell in wt-like vs Unc+Dpy larvae respectively) (Figures 4E-4I). While ectopic *hsp::EFF-1* expression causes embryonic lethality [14,19,25], we found no difference between the fractions of *myo-3p::mCherry* (+) and (-) unhatched eggs (Table S1). Thus, EFF-1 expression in BWMs accounts for the Unc+Dpy phenotypes, larval arrest and clustered BWM nuclei, which supports the hypothesis that ectopic EFF-1 induces BWMs multinucleation by cell-cell fusion causing behavioral and morphological phenotypes.



**Figure 4. EFF-1 expression in BWMs produces Unc+Dpy worms with multinucleated cells**

(A-H) Images of fluorescent Z-stack projections and respective DIC of animals with extrachromosomal *myo-3p::EFF-1*, *myo-3p::mCherry*. (G) White arrowhead, bridge formed between 2 BWMs from opposing quadrants. Yellow arrows, *myo-3p::mCherry* accumulations also in DIC (H). Asterisks, clustered nuclei within one BWM. Scale bars, 100  $\mu$ m.

(I) Number of nuclei per *myo-3p::mCherry* (+) BWM cell in L2s. wt-like (n=12); Unc+Dpy (n=15). Each dot represents the average number of nuclei/BWM cell/worm. Total average  $\pm$  SEM for each phenotype. Two tailed Student's t-test  $p < 0.05^*$ .

See also Table S1.

#### **EFF-1 expression in BWMs induces their fusion and retargets VSV $\Delta$ G-AFF-1 to muscles**

To determine whether EFF-1 expression in BWMs can induce their fusion, we imaged BWMs expressing a membrane-bound YFP (MB::YFP), *myo-3p::EFF-1* and *myo-3p::mCherry*, (see materials and methods). BWMs of wt-like worms have a normal spindle-shaped morphology

with clear cellular membranes between adjacent BWMs showing different levels of cytoplasmic *myo-3p::mCherry* (as *myo-3p::mCherry* is an extrachromosomal array) (Figures 5A-5C). In contrast, *Unc+Dpy* worms had disordered muscle fiber structure, the membranes surrounding the BWMs were indistinguishable and the BWMs showed an evenly distributed cytoplasmic *myo-3p::mCherry* indicating fusion and content mixing between these cells during development (Figures 5D-5F). Thus, EFF-1 expression in BWMs induces disappearance of cellular membranes and cytoplasmic merger, suggesting that EFF-1-mediated cell-cell fusion alters BWM structure, likely resulting in *Unc+Dpy* and larval arrest phenotypes.

We showed that VSV $\Delta$ G-AFF-1 infects EFF-1-expressing hypodermal cells in >80% of the infected worms but infects muscle cells that do not express EFF-1 in about 20% of the infected animals (Figure 2D). Moreover, EFF-1 expression in BWMs induced their fusion, and generated *Unc+Dpy* worms (Table S1, Movie S1 and Figures 4A-4D and 5A-5F). Taken that EFF-1 and AFF-1 are bilateral fusogens and VSVG is a unilateral fusogen, we hypothesized that ectopic expression of EFF-1 in BWMs would increase their infection by VSV $\Delta$ G-AFF-1 but not by VSV $\Delta$ G-G. Therefore, we injected either VSV $\Delta$ G-AFF-1 or VSV $\Delta$ G-G into the pseudocoelom of worms ectopically expressing EFF-1 and mCherry in BWMs and imaged them. For VSV $\Delta$ G-AFF-1 but not for VSV $\Delta$ G-G, the fraction of infected BWMs was significantly higher in *Unc+Dpy* worms (expressing the *myo-3p::mCherry* marker) compared to wt-like (expressing the *myo-3p::mCherry* marker) and wt animals (Figure 6). Thus, EFF-1 expression in BWMs retargets VSV $\Delta$ G-AFF-1 into muscles but does not affect the natural VSV $\Delta$ G-G tropism for BWMs.

We showed that VSV $\Delta$ G-AFF-1 infects neuron and glia cells in the head (Figures S1D-S1F). In order to assess the infection of other fusogen-expressing neurons, we chose the arborized neuron pair PVD, previously shown to express EFF-1, which spans the length of the worm [25], VSV $\Delta$ G-AFF-1-infected PVD cells were not observed. Nevertheless, we found 3 wt animals (out of >100 infected worms), where PVD cells were infected with VSV $\Delta$ G-G following injections with high dosage of pseudotyped viruses (Movie S2). Moreover, we tested whether ectopic AFF-1 expression in PVD or ectopic EFF-1 expression in 12 mechanosensory and chemosensory neurons in *eff-1(ts)* background at the restrictive 25°C, could induce VSV $\Delta$ G-AFF-1 infection in these cells. None of these treatments produced VSV $\Delta$ G-AFF-1 infection in the neurons ectopically expressing EFF-1 or AFF-1 (Figure S3 and Table S2). There are several possibilities to explain why VSV $\Delta$ G-AFF-1 did not infect these neurons; (i) relatively low titer of VSV $\Delta$ G-AFF-1 preps, (ii) a physical barrier such as hypodermis, sheath cells or glia cells that surround neurons or (iii) diffusion of the GFP signal in long neuronal processes.



**Figure 5. EFF-1 expression in BWMs induces their fusion**

(A-C) Confocal images of wt-like adult worms with membrane bound (MB) *myo-3p::MB::YFP* (cyan) and extrachromosomal array containing *myo-3p::EFF-1*, *myo-3p::mCherry* (magenta). (D-F) Confocal images of Unc+Dpy [*myo-3p::MB::YFP* (cyan); *myo-3p::EFF-1*, *myo-3p::mCherry*]. Arrows, unfused BWMs with MB (cyan). Note only two unfused BWMs, all the others appear fused with no MB separating them. Insets correspond to white-dotted area. Scale bars 100  $\mu$ m. See also Movie S1.



**Figure 6. Retargeting of VSV $\Delta$ G-AFF-1 to body wall muscle cells**

Wild-type worms and animals with extrachromosomal array containing *myo-3p::EFF-1* and *myo-3p::mCherry* were injected with VSV $\Delta$ G-AFF-1 (35-63 IU, red pins; n=39 wt, n=50 wt-like and n=27 Unc+Dpy worms) or VSV $\Delta$ G-G ( $3 \times 10^5$  IU, white pins; n=30 wt-like and 14 Unc+Dpy) respectively. Wt worms injected with VSV $\Delta$ G-G (2300-4700 IU, n=56) were taken from figure 2I. Animals were analysed by SDC microscopy. Data represents average percentage of worms with GFP(+) BWMs  $\pm$  SEM. Student's t-test: \*p<0.05.

### EFF-1 expression in fused BWMs enables VSV $\Delta$ G-AFF-1 and VSV $\Delta$ G-G spreading

Based on the aberrant muscle fusion phenotype seen in Unc+Dpy worms following EFF-1 expression in BWMs, we hypothesized that viral spreading through such novel BWM syncytia would be enhanced. To test this hypothesis, we injected VSV $\Delta$ G-AFF-1 or VSV $\Delta$ G-G into wt-like or Unc+Dpy worms and quantified the number of BWM cells that were either (i) mCherry(+) only (expressing EFF-1 and *myo-3p::mCherry*(+)), (ii) GFP(+) only (infected but not expressing EFF-1) or (iii) mCherry(+) and GFP(+) expression in the same cells (infected and expressing EFF-1). We found that for both VSV $\Delta$ G-AFF-1 and VSV $\Delta$ G-G, wt-like worms had individual GFP(+) BWM cells, that were mostly mCherry (-) (Figures 7A-7F, arrows), while Unc+Dpy animals had continuous GFP(+) BWMs that overlapped with mCherry along their body length (Figures 7G-7L, dashed lines and arrows). Compared to wt-like animals, the Unc+Dpy worms had about five-times fewer non-infected mCherry(+) only BWMs, a similar number of infected-GFP(+) only cells and about fifteen-fold more infected BWM cells that also express mCherry (Figures 7M-7N). Lastly, Unc+Dpy worms had  $\sim$ 2.5 nuclei per VSV $\Delta$ G-AFF-1- or VSV $\Delta$ G-G- infected BWMs, compared to wt-like animals with 1 nucleus per BWM cell (Figures 7O-7P). Therefore, EFF-1 expression in BWMs transforms mononucleated BWMs into syncytial muscle fibres enabling viral spreading within the fused cells and increasing the number of both VSV $\Delta$ G-AFF-1- and VSV $\Delta$ G-G-infected BWM cells.



**Figure 7. EFF-1 in BWM enables VSV $\Delta$ G-AFF-1 and VSV $\Delta$ G-G spreading along fused muscles**

(A-L) Z-stack projections of wt-like (A-F) and Unc+Dpy animals (G-L) expressing *myo-3p::EFF-1* and *myo-3p::mCherry* infected with VSV $\Delta$ G-AFF-1 (35-63 IU red pins) or VSV $\Delta$ G-G ( $3 \times 10^5$  IU; white pins). Insets and their corresponding images (yellow frames). Arrows, individual infected (cyan) BWMs. Dashed lines outline grouped BWMs that express *myo-3p::mCherry* and *myo-3p::EFF-1* (magenta) and infected with virus (cyan) showing spreading of GFP. Scale bars, 100  $\mu$ m. (M-N) Number of BWM cells/worm expressing EFF-1 (magenta cell), infected (cyan cell) or expressing EFF-1 and infected (magenta and cyan). wt-like (circles) and Unc+Dpy (triangles). Each point represents a single worm. (O-P) Quantitation of multinucleation of infected BWMs. Each dot represents an average number of nuclei/ GFP(+) BWM, calculated from 1-6 multinucleated BWMs of a single worm. (M and O) wt-like n=6 and Unc+Dpy n=10 animals. (N and P) wt-like n=9 and Unc+Dpy n=7 animals. Black horizontal lines, average  $\pm$  SEM. Student's t-test, \*\*\* p<0.0001; n.s., not-significant.

## Discussion

### **VSV $\Delta$ G-AFF-1 as a cell-specific delivery system**

Previously described viral-vector-based delivery systems used viral unilateral fusogens to target desired cells. For instance, fusogens that are either native, modified or from different viral origin, change the specificity of the viruses targets and facilitate the delivery process [1–3]. In addition, a potent delivery into cancer cell lines was achieved with adenovirus (non-enveloped virus) armed with an adaptor composed from 2 designed ankyrin repeat proteins (DARPs), one binding to the viral fiber knob and the second binding to cancer-specific markers [44]. Our work presents an additional approach to cell-specific delivery, based on viruses coated with a nematode bilateral fusogen, namely AFF-1. A robust cell-specific delivery system should target solely desired cells/tissues, or at least have fewer off-targets. VSV $\Delta$ G-AFF-1 has a high degree of specificity towards cells that express EFF-1/AFF-1 and can be redirected by expressing a partner fusogen on a certain cell. Moreover, VSV $\Delta$ G-AFF-1-mediated infection can be manipulated quantitatively by changing the amount of a partner fusogen expressed on the target cells. VSV and VSV-pseudotypes successfully infect invertebrate and vertebrate cell-lines and model organisms [1,2,35–37]. Although EFF-1 and AFF-1 are not present, and have no known homologs in vertebrates, VSV $\Delta$ G-AFF-1 infects mammalian BHK cells expressing AFF-1/EFF-1 [6]. It will be interesting to test if VSV $\Delta$ G-AFF-1 can specifically target cells ectopically expressing AFF-1/EFF-1 in a vertebrate model. Similarly, pseudotyped VSV $\Delta$ G-SARS-CoV-2-S-glycoprotein [4] could be targeted to humanized worms or mice expressing hACE2 to study entry mechanisms, pathogenesis and potential treatments for viral infections, including COVID19 in model organisms.

### **Additional applications for VSV $\Delta$ G-AFF-1**

In the recent decade, extracellular vesicles (EVs) emerged as intercellular communication carriers, containing variable cargoes (e.g lipids, DNA, RNA, toxins and proteins) and involved in different biological processes including cell-cell interactions, cancer, tissue and neuronal regeneration. EVs can serve as biomarkers and are potent vehicles for gene and drug delivery [26,45,46]. However, work with EVs-based vectors has to tackle the issues of specific targeting, loading of desired cargo, presence of undesired/non-specific content and quantification of produced EVs. Our system consisting of enveloped pseudotyped virus coated with bilateral fusogens and host cells expressing bilateral fusogens, demonstrates cell-specific targeting. Moreover, VSV $\Delta$ G-AFF-1 has the benefits of viral-based vectors, namely loading a specific and tailored cargo including fluorescent markers such as GFP-coding RNA sequence, simple vector quantification and cargo amplification within the host cell. Therefore, VSV $\Delta$ G-AFF-1 may serve as a paradigm for EVs-mediated transport. It can be utilized to explore how

EVs deliver their cargos and to study whether and how EVs are involved in different biological processes. For instance, VSV $\Delta$ G-AFF-1 can be utilized to study how vesicular AFF-1/EFF-1 delivery mediates neuronal regeneration. We can test a model in which non-cell autonomous, AFF-1-coated extracellular vesicles mediates PVD regeneration in *C. elegans* [26].

Exoplasmic membrane fusion is a fundamental biological process involved in sexual reproduction, organogenesis, neuronal regeneration and viral infection [28,31,47,48]. Despite the importance of these processes, very few cell-cell fusogens have been identified and characterized so far. These include: (i) Syncytins involved in placenta formation [49–51]; (ii) Fusexins including EFF-1 and AFF-1 from *C. elegans* [14,17–22,31] and HAP2/GCS1 which mediates gamete fusion in protists and flowering plants [38,52–54] and (iii) Myomaker (TMEM8c) and myomerger (myomixer/minion) proteins that fuse muscle cells in vertebrates [55–58]. We demonstrate that VSV $\Delta$ G-AFF-1 injected into *C. elegans* encounters and infects different EFF-1/AFF-1-expressing cells. Moreover, bilateral heterotypic fusion has been described between EFF-1 and AFF-1 and also between EFF-1 and HAP2/GCS1 expressed on two populations of BHKs [38]. Therefore, VSV $\Delta$ G-AFF-1/EFF-1 may be exploited in screens to identify new bilateral fusogens or fusogen-interacting proteins in different organisms.

### **VSV $\Delta$ G-AFF-1 infects excretory, hypodermal, neuronal, glial and rarely muscle cells**

In this study, we find that VSV $\Delta$ G-AFF-1 rarely infects muscle cells in wild type and *aff-1(-)* but not in *eff-1(-)* worms, suggesting that this infection requires low levels of EFF-1 on muscle cells. The PVD neuron is known to express EFF-1 [25] and expression of a GFP reporter in the PVD dendritic tree shows continuous staining between individual muscle cells and the adjacently localized PVD branches [25,59]. Moreover, this muscle staining is abolished in *eff-1(-)* worms, suggesting that some muscle cells may transiently express EFF-1 and fuse to EFF-1-expressing PVD (Dganit Melamed, Meital Oren-Suissa and BP, unpublished data). Therefore, VSV $\Delta$ G-AFF-1 may interact with undetected levels of EFF-1-expressed on muscle cells to infect them. On the other hand, this rare infection may be non-specific and could result from direct injections into muscle cells. For both VSV $\Delta$ G-G and VSV $\Delta$ G-AFF-1 injections, the fraction of worms with GFP(+) excretory cell is similar in all backgrounds. The excretory cell is suggested to eliminate waste from worm's body fluids [60,61]. Hence, it may endocytose viruses injected into the pseudocoelom and becomes infected independently of viral-coating (e.g. VSV $\Delta$ G-G or VSV $\Delta$ G-AFF-1) or worm background. Finally, we show that both VSV $\Delta$ G-G and VSV $\Delta$ G-AFF-1 can infect neuronal and glial cells. VSV $\Delta$ G-G was previously reported to efficiently infect neuron and glia cells in mouse, rat, hamster, human, and *Drosophila* cells [2]. Some *C. elegans* neurons and glia cells are known to express EFF-1 and AFF-1 [14,18],

suggesting that infection by VSV $\Delta$ G-AFF-1 could be mediated by bilateral interactions between the virus and EFF-1/AFF-1-expressed on the target cells. For VSV $\Delta$ G-AFF-1 but not for VSV $\Delta$ G-G, we observe significantly more infected glia and neurons in the absence of EFF-1. In wt worms, VSV $\Delta$ G-AFF-1 mostly infects EFF-1-expressing hypodermal cells found in immediate proximity to the pseudocoelom. Moreover, the absence of EFF-1 abolishes hypodermal infection, which may reduce the competition for VSV $\Delta$ G-AFF-1 mediated infection, and consequently increase the amount of infection in AFF-1-expressing glia/neuron cells. Alternatively, the infection of hypodermal cells could mask other infected cells and complicate their observation.

### **Muscle fusion and muscle fusogens**

Myogenesis of striated muscle involves the formation of multinucleated myofibers by myoblast-myoblast fusion. Myoblast fusion is also essential for muscle tissue patterning, maintenance and damage repair [62,63]. In contrast, *C. elegans* BWMs do not fuse and exist as mononucleated cells, contracting in synchrony that mediate gait [64]. We found that EFF-1-mediated BWMs fusion results in loss of coordination, although we did not determine whether the observed locomotory defects result from aberrant joining of separately-innervated muscles or from a loss of contractility. These results demonstrate that a locomotory circuit may be optimally adjusted for both separate (as in *C. elegans*) and syncytial (as in vertebrate) striated muscles. Indeed, failure of myoblast fusion in vertebrates may have equally severe phenotypes [47,48]. Despite the importance of muscle fusion, the studies of muscle fusion proteins are just emerging [55–58]. We suggest that VSV $\Delta$ G-AFF-1 can be used in screens to identify additional muscle fusogens in invertebrates (e.g. *Drosophila*). Alternatively, viruses coated with the bilateral Myomaker, can be a tool to screen for muscle-expressed Myomaker-interacting proteins in vertebrates.

### **Materials and methods**

#### **Nematode strains**

Unless otherwise stated, all nematodes were maintained at 20°C, according to standard protocols [65,66]. *drh-1(tm1329)* served as the wild type background. Mutations and strains that were used in this study are listed in Table S3.

#### **DNA constructs**

The *myo-3p::EFF-1* plasmid was constructed by cloning the *myo-3* promoter region from *myo-3p::mCherry* plasmid with Sal I (New England BioLabs Cat#R3138) and Nhe I (ThermoFisher

Cat# FD0974) and inserting it into the *hsp16-2::EFF-1* plasmid cut with the same enzymes to replace the original heat shock promoter. To produce *eff-2 (hy51)* mutant worms with CRISPR, the following DNA constructs were generated:

1. pBG115 plasmid encoding single guide targeting *eff-2* to insert *mNeonGreen* was generated by cloning *eff-2* targeting sequence into the CAS9 plasmid pDD162 with BG84 and BG85 primers.
2. BG123 conversion oligonucleotide encoding wt *pha-1* fragment was PAGE purified.
3. PCR amplicon encoding for the mNeonGreen and *unc-54* 3'UTR flanked by homology arms to the *eff-2* gene, generated by amplification of mNeonGreen from plasmid X, with BG129 and BG130 primers containing a 50 bp homology arms to *eff-2*.

Sequences of primers and oligonucleotides mentioned above are found in Table S3.

### Transgenic animals

For standard extrachromosomal transgenes, germline transformation was performed using standard protocols [67]. Transgenic lines were kept as extrachromosomal arrays and maintained by following the expression from either *myo-3p::mCherry*, *myo-2p::GFP*, or *mec-4p::dsRed*, *odr-1p::dsRed* plasmids that were co-injected as transformation markers. *myo-3p::mCherry* encodes mCherry expression in body wall muscle and vulva muscle cells. *myo-2p::GFP* encodes GFP expression specifically expressed in pharyngeal muscles. *pmec-4::dsRed* encodes dsRed expression in six touch receptor neurons. *odr-1p::dsRed* encodes dsRed expression in two odor sensory neurons. Plasmids mentioned above and strains containing these arrays are listed in Table S3. Transgenic lines with extrachromosomal arrays were generated as follows:

- BP2126: *drh-1(tm1329);eff-1(hy21)* injected with 20ng/μl *pmyo-2::GFP* as transformation marker and 0.1ng/μl *pdes-2::AFF-1*.
- BP2131-3: *drh-1(tm1329);eff-1(hy21)* injected 10ng/μl *pmec-4::dsRed* and 10ng/μl *podr-1::dsRed* as transformation markers and to label sensory neurons, 1ng/μl *pmec-4::EFF-1* and 1ng/μl *podr-1::EFF-1*.
- BP2137: *drh-1(tm1329)* injected 10ng/μl *myo-3p::mCherry* as transformation marker and to label Body Wall Muscle cells, and 1ng/μl *myo-3p::EFF-1*.

*eff-2(hy51)* allele was generated by CRISPR/Cas9 [65,66] insertion of mNeonGreen into the first exon of *eff-2* gene. *pha-1* was used as a conversion marker. *pha-1(e2123)* temperature sensitive worms were injected with 50 ng/μl pBG115 targeting *eff-2* and containing CAS9, 50 ng/μl pJW1285 sgRNA plasmid against *pha-1* that contains the CAS9, 20 ng/μl BG123 conversion oligonucleotide encoding wt *pha-1* fragment and 20 ng/μl amplicon encoding for the mNeonGreen and *unc-54* 3'UTR flanked by homology arms to the *eff-2* gene. Worms that

survived development at the restrictive temperature (25°C) were screened and sequenced for mutations in the *eff-2* gene. *hy51* is the result of an imprecise partial inverted insertion of the PCR fragment into the *eff-2* locus. One bp was deleted at position +31 and 488bp of the unc-54 3'UTR and mNeonGreen gene were inserted into *eff-2* coding region. The product of the inverted insertion is a non-functional fluorescent protein that causes a frame shift in *eff-2* and terminates its translation at Amino Acid #18. The *eff-2* targeting sequence was added to primers (see Table S3) and inserted to the linearized vector using restriction-free cloning technique.

### **Live imaging of worms**

For imaging of viral infection and BWM fusion in *C. elegans*, worms were analyzed by Nomarski optics and fluorescence microscopy using Nikon eclipse Ti inverted microscope with Yokogawa CSU-X1 spinning disk confocal (SDC) as described previously [26,27]. Briefly, animals were anesthetized in 0.01-0.05% tetramisole in M9 solution for 20-30 min and then picked with an eyelash attached to a toothpick and transferred to a 5 µl droplet of M9 solution placed on 3% agar slide. Images were acquired with Metamorph software, when using the spinning disk confocal. Z-stacks were taken with Plan Fluor 40x NA=1.3 or Apochromat 60x NA=1.4 objectives. Excitation of GFP was achieved with 488 nm wavelength laser (2-8% intensity, 100 ms exposure time). mCherry was excited with 561 nm wavelength (15-20% intensity, 100 ms exposure time). ~0.5 µm z-steps were recorded with iXon3 EMCCD camera (Andor). Multidimensional data were reconstructed as maximum intensity projections using Fiji software (NIH ImageJ). For live imaging of worms with fused BWM phenotypes, plates with worms were placed on the stage of Zeiss stereo Discovery V8 stereo microscope. Images and movies were captured at x8 magnification with additional magnification from PlanApo S 2.3X objective and a Hamamatsu ORCA-ER camera controlled by micromanager software (<https://micro-manager.org>). Figures were prepared using Fiji, Adobe Photoshop CS5 and GraphPad Prism 8.

### **DNA transformation and viral infection by microinjection**

Microinjections were performed as described [7,34] with some modifications. Shortly, late L4 or young adult worms were placed into droplet of halocarbon oil on 3% agarose pads. Pulled capillary needles were secured onto a Nikon DIAPHOT 300 microscope equipped with a micromanipulator and regulated pressure source (Narishige). For DNA transformation, needles were loaded with 0.8 µl with DNA solution containing TE buffer, the target construct DNA, a co-injection marker DNA and the required amount of with pKSI-1 (empty vector) DNA to reach a total concentration of 100 ng/µl DNA. For experiments with viral infection, needles

were loaded 0.8  $\mu$ l DMEM (mock-infections) or pseudo viruses in DMEM+5%FBS. Infection doses of VSV are based on VSV titration on BHK cells and used 10nL volume as a single microinjection dose [7]. Agar pads with worms were placed on stage of Nikon DIAPHOT 300 microscope. Worms were observed under x40 objective. For DNA transformation, animals were injected into the gonad and immediately placed into droplet of M9 buffer placed on NGM plates seeded with OP50-1 *E. coli*. For experiments with viral infection worms were injected into pseudocoelom -behind the terminal bulb of the pharynx and were immediately placed into droplet of M9 buffer placed on NGM plates with 50  $\mu$ g/mL FUdR (Sigma), seeded with OP50-1 *E. coli*. Unless otherwise stated, animals were maintained at 25°C until scoring of infection.

### Scoring viral infection

Scoring viral infection using fluorescence assay was performed as described [7,34] with some modifications. Briefly, 48-72 hours post injection worms were processed for live imaging as described above. Animals that were unresponsive to prodding by a platinum wire worm pick were considered dead and were removed from the experiment. Animals that crawled off the plate or were lost during the experiment were censored. Worms with  $\geq 1$  GFP (+) cells were considered as infected worms, while not injected or DMEM injected worms served as a negative controls. For different experiments, either the number of GFP(+) cells/animals or the type of infected tissues were observed and quantified.

### Temperature shift experiments

Temperature sensitive *eff-1(hy21ts)* mutant worms were synchronized by hypochlorite treatment of adult worms. The obtained eggs were left for overnight L1 hatching on NGM plates without food at 20° C. L1 animals were then transferred to NGM plates with OP50 bacteria at 15° C or 25° C incubators until reaching the desired developmental stage. The plates were either downshifted from 25° C to 15° C, or left at 25° C or at 15° C throughout the experiment. The developmental stages were determined by analyzing gonadal size and structure using Nomarski optics. Finally, worms were injected with VSV $\Delta$ G-AFF-1, maintained and imaged as described above.

### Counting overlapping cells

To test if EFF-1 expressing BWMs were infected by VSV $\Delta$ G-AFF-1, we utilized worms with an extrachromosomal array expressing EFF-1 under the *myo-3* promoter and a plasmid containing *myo-3p::mCherry*. We found that most mCherry (+) worms had a wt-like phenotype, but a small fraction of these worms were Unc+Dpy. Importantly, all sibling mCherry(-) worms were wt-like (Table S1). Hence, for the experiment we utilized a fluorescence

stereomicroscope and chose late L4/ young adult, wt-like and Unc+Dpy animals that had continuous *myo-3p::mCherry(+)* BWMs (which could express EFF-1 and fuse with each other). Next, these worms were injected with VSV $\Delta$ G-AFF-1 or VSV $\Delta$ G-G. 48-72h later, Z-stack images of the worms were obtained with SDC microscope (as described in live imaging section). Worms with  $\geq 1$  infected BWM were selected. For each worm, we counted the number of BWMs that were mCherry(+) only (express EFF-1), GFP(+) only (infected by virus) and overlapping- with both mCherry(+) and GFP(+) (express EFF-1 and infected).

### Counting number of nuclei per BWM

To test if ectopic EFF-1 expression in BWMs produces multinucleated BWMs, wt-like and Unc+Dpy animals that had continuous *myo-3p::mCherry(+)* BWMs (which could express EFF-1 and fuse with each other) were imaged by SDC microscope as described above. In one set of experiments we imaged L2 worms and counted number of nuclei per *myo-3p::mCherry* cell. In a second set of experiments, we imaged adult worms with BWMs infected by either VSV $\Delta$ G-AFF-1 or VSV $\Delta$ G-G and counted number of nuclei per infected (GFP(+)) BWM cell. For both sets of experiments, in worms with at least one multinucleated BWM we monitored all multinucleated BWMs and calculated the average number of nuclei/BWM for each worm. Worms in which multinucleated cells were not observed, were considered as having 1 nucleus/BWM.

### Counting phenotypes in worms expressing EFF-1 in BWMs

To find whether ectopic expression of EFF-1 in BWM cells produces any special phenotypes, we used BP2137 *drh-1(tm1329)IV*; *hyEx375[myo-3p::EFF-1, myo-3p::mCherry, KS bluescript]*. We first isolated 4 wt-like *myo-3p::mCherry* L4 hermaphrodite worms, one worm per NGM plate+Op50. These worms were led to lay eggs and were transferred to a fresh plate 1-2 times per day during 5 days. Progeny including eggs, larvae and adults were divided into two groups, namely *myo-3p::mCherry(+)* and *myo-3p::mCherry(-)*. We counted the total number of progeny with a certain phenotype (e.g. wt-like worms, adult Unc+Dpy worms, larval arrested Unc+Dpy worms and unhatched eggs) for each of the 4 mothers. Finally, we calculated the average number of worms with certain phenotype  $\pm$  SEM and the fraction $\pm$ SE of worms with a certain phenotype in each group.

### Cell culture and preparation of pseudoviruses

Baby Hamster Kidney cells (BHK), BHK-21(ATCC) were cultured in Dulbecco's Modified Eagles Medium (DMEM) and recombinant viruses were prepared as described [6] with some modifications. Briefly, BHK cells were grown to 70% confluence on 10 cm plates and then

transfected using Fugene HD + OptiMEM at ratio 1:4 (Fugene:DNA), with plasmids encoding pOA20 (pCAGGS::*aff-1*::FLAG, 2µg/ml final concentration) [6] or pOA28 (pCAGGS::VSV-G Indiana, 1µg/ml final concentration)[33]. Following 24 h incubation at 37°C in 5% CO<sub>2</sub>, cells were infected with VSVG-complemented VSVΔG recombinant virus (VSVΔG-G) at a multiplicity of infection (MOI) of 5, for 1 hour at 37°C in a 5% CO<sub>2</sub> incubator in serum free DMEM. Virus infected cells were washed 3-6 times with PBS (+ Ca<sup>++</sup> & Mg<sup>++</sup>) to remove unabsorbed VSVΔG-G virus. Following a 24 h incubation period at 37°C, the supernatant containing the VSVΔG-G, or VSVΔG-AFF-1 pseudoviruses were harvested without scraping the cells and centrifuged at 600 g for 10 min at 4°C to clear cell debris. VSVΔG-AFF-1 Virions were filtered through 0.22 µm filter unit and then double concentrated. First, by pelleting at 100,000 g through a 20% sucrose cushion, and resuspension in 10%FBS DMEM, second, by pelleting at 100,000 g through a 10% sucrose cushion, and final resuspension in 45µl DMEM. Finally, VSVΔG-AFF-1 was incubated with anti-VSV-G antibody mAb diluted 1:1000 to inhibit infection due to residual presence of VSV-G. The effective blocking of VSV-G was confirmed by titrating pseudoviruses in BHK cells and by injection of VSVΔG-G incubated with anti-VSV-G into worms (Figure S4).

### **Titerting VSV pseudotyped viruses**

Titerting VSV pseudotyped viruses was performed as described [6] with some modifications. Briefly, 5x10<sup>3</sup> BHK cells were plated into each well of a 96 well tissue culture plate (NUNC, cat# 167008). To determine the titer of VSVΔG-AFF-1, BHK cells were initially transfected with 2 µg/ml pOA20 (pCAGGS::*AFF-1*::FLAG). Cells transfected with empty vector served as control. Eight serial x2 dilutions of the virus were performed and added to cells. After 18-24 hours of incubation, GFP expressing cells were counted in at least three dilutions using x20 objective of Zeiss Axiovert 200M fluorescence microscope. Inoculation was performed in the presence of anti-VSV-G antibody mAb diluted 1:1000 to inhibit infection due to residual presence of VSV-G.

### **Statistical tests**

The specific tests used are described in the figure captions and the results section. The graphs show mean ± SEM unless noted otherwise. For each experiment at least two biological replicates were performed and the number of animals per experiment is stated in the figure legends.

## References

1. Lichty, B.D., Power, A.T., Stojdl, D.F., and Bell, J.C. (2004). Vesicular stomatitis virus: Re-inventing the bullet. *Trends Mol. Med.* *10*, 210–216.
2. van den Pol, A.N., Ozduman, K., Wollmann, G., Ho, W.S.C., Simon, I., Yao, Y., Rose, J.K., and Ghosh, P. (2009). Viral strategies for studying the brain, including a replication-restricted self-amplifying delta-G vesicular stomatitis virus that rapidly expresses transgenes in brain and can generate a multicolor Golgi-like expression. *J. Comp. Neurol.* *516*, 456–481.
3. Hastie, E., Cataldi, M., Marriott, I., and Grdzelishvili, V.Z. (2013). Understanding and altering cell tropism of vesicular stomatitis virus. *Virus Res.* *176*, 16–32.
4. Hoffmann, M., Kleine-Weber, H., Schroeder, S., Krüger, N., Herrler, T., Erichsen, S., Schiergens, T.S., Herrler, G., Wu, N.-H., Nitsche, A., *et al.* (2020). SARS-CoV-2 Cell Entry Depends on ACE2 and TMPRSS2 and Is Blocked by a Clinically Proven Protease Inhibitor. *Cell* *181*, 271–280.
5. Halperin, S.A., Das, R., Onorato, M.T., Liu, K., Martin, J., Grant-Klein, R.J., Nichols, R., Collier, B.-A., Helmond, F.A., and Simon, J.K. (2019). Immunogenicity, Lot Consistency, and Extended Safety of rVSVΔG-ZEBOV-GP Vaccine: A Phase 3 Randomized, Double-Blind, Placebo-Controlled Study in Healthy Adults. *J. Infect. Dis.* *220*, 1127–1135.
6. Avinoam, O., Fridman, K., Valansi, C., Abutbul, I., Zeev-Ben-Mordehai, T., Maurer, U.E., Sapir, A., Danino, D., Grünwald, K., White, J.M., *et al.* (2011). Conserved eukaryotic fusogens can fuse viral envelopes to cells. *Science*. *332*, 589–592.
7. Gammon, D.B., Ishidate, T., Li, L., Gu, W., Silverman, N., and Mello, C.C. (2017). The Antiviral RNA Interference Response Provides Resistance to Lethal Arbovirus Infection and Vertical Transmission in *Caenorhabditis elegans*. *Curr. Biol.* *27*, 795–806.
8. Presley, J.F., Smith, C., Hirschberg, K., Miller, C., Cole, N.B., Zaal, K.J.M., and Lippincott-Schwartz, J. (1998). Golgi membrane dynamics. *Mol. Biol. Cell* *9*, 1617–1626.
9. Ogino, T., and Green, T.J. (2019). RNA Synthesis and Capping by Non-segmented Negative Strand RNA Viral Polymerases: Lessons From a Prototypic Virus. *Front. Microbiol.* *10*, 1490.
10. Finkelshtein, D., Werman, A., Novick, D., Barak, S., and Rubinstein, M. (2013). LDL receptor and its family members serve as the cellular receptors for vesicular stomatitis virus. *Proc. Natl. Acad. Sci. U. S. A.* *110*, 7306–7311.
11. Bergman, I., Whitaker-Dowling, P., Gao, Y., Griffin, J.A., and Watkins, S.C. (2003). Vesicular stomatitis virus expressing a chimeric Sindbis glycoprotein containing an Fc antibody binding domain targets to Her2/neu overexpressing breast cancer cells. *Virology* *316*, 337–347.
12. Schnell, M.J., Johnson, J.E., Buonocore, L., and Rose, J.K. (1997). Construction of a novel virus that targets HIV-1-infected cells and controls HIV-1 infection. *Cell* *90*, 849–857.
13. Gao, Y., Whitaker-Dowling, P., Griffin, J.A., Barmada, M.A., and Bergman, I. (2009). Recombinant vesicular stomatitis virus targeted to Her2/neu combined with anti-CTLA4 antibody eliminates implanted mammary tumors. *Cancer Gene Ther.* *16*, 44–52.
14. Mohler, W.A., Shemer, G., Del Campo, J.J., Valansi, C., Opoku-Serebuoh, E., Scranton, V., Assaf, N., White, J.G., and Podbilewicz, B. (2002). The type 1 membrane protein EFF-1 is essential for development cell fusion. *Dev. Cell* *2*, 355–362.
15. Shemer, G., and Podbilewicz, B. (2002). LIN-39/Hox triggers cell division and represses EFF-1/fusogen-dependent vulval cell fusion. *Genes Dev.*
16. Podbilewicz, B. (2006). Cell fusion. *WormBook* *93*, 71–79.
17. Rasmussen, J.P., English, K., Tenlen, J.R., and Priess, J.R. (2008). Notch Signaling and Morphogenesis of Single-Cell Tubes in the *C. elegans* Digestive Tract. *Dev. Cell* *14*, 559–569.

18. Sapir, A., Choi, J., Leikina, E., Avinoam, O., Valansi, C., Chernomordik, L. V., Newman, A.P., and Podbilewicz, B. (2007). AFF-1, a FOS-1-Regulated Fusogen, Mediates Fusion of the Anchor Cell in *C. elegans*. *Dev. Cell* 12, 683–698.
19. Shemer, G., Suissa, M., Kolotuev, I., Nguyen, K.C.Q., Hall, D.H., and Podbilewicz, B. (2004). EFF-1 is sufficient to initiate and execute tissue-specific cell fusion in *C. elegans*. *Curr. Biol.* 14, 1587–1591.
20. Abdus-Saboor, I., Mancuso, V.P., Murray, J.I., Palozola, K., Norris, C., Hall, D.H., Howell, K., Huang, K., and Sundaram, M. V. (2011). Notch and Ras promote sequential steps of excretory tube development in *C. elegans*. *Development* 138, 3545–3555.
21. Soulavie, F., Hall, D.H., and Sundaram, M. V. (2018). The AFF-1 exoplasmic fusogen is required for endocytic scission and seamless tube elongation. *Nat. Commun.* 9, 1741.
22. Stone, C.E., Hall, D.H., and Sundaram, M. V. (2009). Lipocalin signaling controls unicellular tube development in the *Caenorhabditis elegans* excretory system. *Dev. Biol.* 329, 201–211.
23. Ghosh-Roy, A., Wu, Z., Goncharov, A., Jin, Y., and Chisholm, A.D. (2010). Calcium and cyclic AMP promote axonal regeneration in *Caenorhabditis elegans* and require DLK-1 kinase. *J. Neurosci.* 30, 3175–3183.
24. Neumann, B., Coakley, S., Giordano-Santini, R., Linton, C., Lee, E.S. eun., Nakagawa, A., Xue, D., and Hilliard, M.A. (2015). EFF-1-mediated regenerative axonal fusion requires components of the apoptotic pathway. *Nature* 517, 219–222.
25. Oren-Suissa, M., Hall, D.H., Treinin, M., Shemer, G., and Podbilewicz, B. (2010). The fusogen EFF-1 controls sculpting of mechanosensory dendrites. *Science*. 328, 1285–1288.
26. Oren-Suissa, M., Gattegno, T., Kravtsov, V., and Podbilewicz, B. (2017). Extrinsic repair of injured dendrites as a paradigm for regeneration by fusion in *Caenorhabditis elegans*. *Genetics* 206, 215–230.
27. Kravtsov, V., Oren-Suissa, M., and Podbilewicz, B. (2017). The fusogen AFF-1 can rejuvenate the regenerative potential of adult dendritic trees by self-fusion. *Dev.* 144, 2364–2374.
28. Harrison, S.C. (2015). Viral membrane fusion. *Virology* 479–480, 498–507.
29. Podbilewicz, B. (2014). Virus and Cell Fusion Mechanisms. *Annu. Rev. Cell Dev. Biol.* 30, 111–139.
30. Pérez-Vargas, J., Krey, T., Valansi, C., Avinoam, O., Haouz, A., Jamin, M., Raveh-Barak, H., Podbilewicz, B., and Rey, F.A. (2014). Structural basis of eukaryotic cell-cell fusion. *Cell* 157, 407–419.
31. White, J.M. (2007). The First Family of Cell-Cell Fusion. *Dev. Cell* 12, 683–698.
32. Robison, C.S., and Whitt, M.A. (2000). The Membrane-Proximal Stem Region of Vesicular Stomatitis Virus G Protein Confers Efficient Virus Assembly. *J. Virol.* 74, 2239–2246.
33. Whitt, M.A. (2010). Generation of VSV pseudotypes using recombinant  $\Delta$ G-VSV for studies on virus entry, identification of entry inhibitors, and immune responses to vaccines. *J. Virol. Methods* 169, 365–374.
34. Martin, A., Rex, E., Ishidate, T., Lin, R., and Gammon, D. (2017). Infection of *Caenorhabditis elegans* with Vesicular Stomatitis Virus via Microinjection. *BIO-PROTOCOL* 7, e2617.
35. Quiroz, E., Moreno, N., Peralta, P.H., and Tesh, R.B. (1988). A human case of encephalitis associated with vesicular stomatitis virus (Indiana serotype) infection. *Am. J. Trop. Med. Hyg.* 39, 312–314.
36. Guerra-Varela, J., Baz-Martínez, M., Da Silva-Álvarez, S., Losada, A.P., Quiroga, M.I., Collado, M., Rivas, C., and Sánchez, L. (2018). Susceptibility of Zebrafish to Vesicular Stomatitis Virus Infection. *Zebrafish* 15, 124–132.
37. Barrera, J.D.C., and Letchworth, G.J. (1996). Persistence of Vesicular Stomatitis Virus

- New Jersey RNA in Convalescent Hamsters. *Virology* 219, 453–464.
38. Valansi, C., Moi, D., Leikina, E., Matveev, E., Graña, M., Chernomordik, L. V., Romero, H., Aguilar, P.S., and Podbilewicz, B. (2017). Arabidopsis HAP2/GCS1 is a gamete fusion protein homologous to somatic and viral fusogens. *J. Cell Biol.* 216, 571–581.
  39. Yochem, J., Gu, T., and Han, M. (1998). A new marker for mosaic analysis in *Caenorhabditis elegans* indicates a fusion between hyp6 and hyp7, two major components of the hypodermis. *Genetics* 149, 1323–1334.
  40. Podbilewicz, B., and White, J.G. (1994). Cell fusions in the developing epithelia of *C. elegans*. *Dev. Biol.* 161, 408–424.
  41. Fukushige, T., Brodigan, T.M., Schriefer, L.A., Waterston, R.H., and Krause, M. (2006). Defining the transcriptional redundancy of early bodywall muscle development in *C. elegans*: Evidence for a unified theory of animal muscle development. *Genes Dev.* 20, 3395–3406.
  42. Kim, J., Löwe, T., and Hoppe, T. (2008). Protein quality control gets muscle into shape. *Trends Cell Biol.* 18, 264–272.
  43. Frumkin, A., Dror, S., Pokrzywa, W., Bar-Lavan, Y., Karady, I., Hoppe, T., and Ben-Zvi, A. (2014). Challenging muscle homeostasis uncovers novel chaperone interactions in *Caenorhabditis elegans*. *Front. Mol. Biosci.* 6, 21.
  44. Dreier, B., Honegger, A., Hess, C., Nagy-Davidescu, G., Mittl, P.R.E., Grütter, M.G., Belousova, N., Mikheeva, G., Krasnykh, V., and Plückthun, A. (2013). Development of a generic adenovirus delivery system based on structure-guided design of bispecific trimeric DARPins adapters. *Proc. Natl. Acad. Sci. U. S. A.* 5, E869–E877.
  45. Raposo, G., and Stoorvogel, W. (2013). Extracellular vesicles: Exosomes, microvesicles, and friends. *J. Cell Biol.* 200, 373–383.
  46. Sdrimas, K., and Kourembanas, S. (2014). MSC microvesicles for the treatment of lung disease: A new paradigm for cell-free therapy. *Antioxidants Redox Signal.* 21, 1905–1915.
  47. Segev, N., Avinoam, O., and Podbilewicz, B. (2018). Fusogens. *Curr. Biol.* 28, R378–R380.
  48. Brukman, N.G., Uygur, B., Podbilewicz, B., and Chernomordik, L. V. (2019). How cells fuse. *J. Cell Biol.* 218, 1436–1451.
  49. Blond, J.-L., Lavillette, D., Cheynet, V., Bouton, O., Oriol, G., Chapel-Fernandes, S., Mandrand, B., Mallet, F., and Cosset, F.-L. (2000). An Envelope Glycoprotein of the Human Endogenous Retrovirus HERV-W Is Expressed in the Human Placenta and Fuses Cells Expressing the Type D Mammalian Retrovirus Receptor. *J. Virol.* 74, 3321–3329.
  50. Sha, M., Lee, X., Li, X. ping, Veldman, G.M., Finnerty, H., Racie, L., LaVallie, E., Tang, X.Y., Edouard, P., Howes, S., *et al.* (2000). Syncytin is a captive retroviral envelope protein involved in human placental morphogenesis. *Nature* 403, 785–789.
  51. Kokkinos, M.I., Murthi, P., Wafai, R., Thompson, E.W., and Newgreen, D.F. (2010). Cadherins in the human placenta - Epithelial-mesenchymal transition (EMT) and placental development. *Placenta* 31, 747–755.
  52. von Besser, K., Frank, A.C., Johnson, M.A., and Preuss, D. (2006). Arabidopsis HAP2 (GCS1) is a sperm-specific gene required for pollen tube guidance and fertilization. *Development* 133, 4761–4769.
  53. Liu, C., Zhou, Y., Zhang, X., Zhang, J., Zhou, Z., Weng, J., Li, X., and Wang, Z. (2019). Natural variation in the THICK TASSEL DWARF1 (TD1) gene in the regulation of maize (*Zea mays* L.) ear-related traits. *Breed. Sci.* 69, 323–331.
  54. Cole, E.S., Cassidy-Hanley, D., Fricke Pinello, J., Zeng, H., Hsueh, M., Kolbin, D., Ozzello, C., Giddings, T., Winey, M., and Clark, T.G. (2014). Function of the male-gamete-specific fusion protein HAP2 in a seven-sexed ciliate. *Curr. Biol.* 24, 2168–2173.
  55. Millay, D.P., O'Rourke, J.R., Sutherland, L.B., Bezprozvannaya, S., Shelton, J.M.,

- Bassel-Duby, R., and Olson, E.N. (2013). Myomaker is a membrane activator of myoblast fusion and muscle formation. *Nature* 499, 301–305.
56. Gamage, D.G., Leikina, E., Quinn, M.E., Ratinov, A., Chernomordik, L. V., and Millay, D.P. (2017). Insights into the localization and function of myomaker during myoblast fusion. *J. Biol. Chem.* 292, 17272–17289.
  57. Mitani, Y., Vagnozzi, R.J., and Millay, D.P. (2017). In vivo myomaker-mediated heterologous fusion and nuclear reprogramming. *FASEB J.* 31, 400–411.
  58. Bi, P., Ramirez-Martinez, A., Li, H., Cannavino, J., McAnally, J.R., Shelton, J.M., Sánchez-Ortiz, E., Bassel-Duby, R., and Olson, E.N. (2017). Control of muscle formation by the fusogenic micropeptide myomixer. *Science* (80-. ). 356, 323–327.
  59. Zhu, T., Liang, X., Wang, X.M., and Shen, K. (2017). Dynein and EFF-1 control dendrite morphology by regulating the localization pattern of SAX-7 in epidermal cells. *J. Cell Sci.* 130, 4063–4071.
  60. Buechner, M., Hall, D.H., Bhatt, H., and Hedgecock, E.M. (1999). Cystic canal mutants in *Caenorhabditis elegans* are defective in the apical membrane domain of the renal (excretory) cell. *Dev. Biol.* 214, 227–241.
  61. Nelson, F.K., and Riddle, D.L. (1984). Functional study of the *Caenorhabditis elegans* secretory-excretory system using laser microsurgery. *J. Exp. Zool.* 231, 45–56.
  62. Gunage, R.D., Dhanyasi, N., Reichert, H., and VijayRaghavan, K. (2017). *Drosophila* adult muscle development and regeneration. *Semin. Cell Dev. Biol.* 72, 56–66.
  63. Sampath, S.C., Sampath, S.C., and Millay, D.P. (2018). Myoblast fusion confusion: The resolution begins. *Skelet. Muscle* 8, 3.
  64. Gjorgjieva, J., Biron, D., and Haspel, G. (2014). Neurobiology of *caenorhabditis elegans* locomotion: Where do we stand? *Bioscience*, 476–486.
  65. Brenner, S. (1974). The genetics of *Caenorhabditis elegans*. *Genetics* 77, 71–94.
  66. Sulston, J., and Hodgkin, J. (1988). Methods in the nematode *C. elegans*. In Cold Spring Harbor Laboratory Press, pp. 587–606.
  67. Mello, C., and Fire, A. (1995). DNA Transformation. *Methods Cell Biol.* 8, 2159–2165.
  68. Takada, A., Robison, C., Goto, H., Sanchez, A., Murti, K.G., Whitt, M.A., and Kawaoka, Y. (1997). A system for functional analysis of Ebola virus glycoprotein. *Proc Natl Acad Sci U S A* 94, 14764-14769.
  69. Stoker, M., and Macpherson, I. (1964). Syrian Hamster Fibroblast Cell Line Bhk21 and Its Derivatives. *Nature* 203, 1355-1357.
  70. Diaz-Balzac, C.A., Rahman, M., Lazaro-Pena, M.I., Martin Hernandez, L.A., Salzberg, Y., Aguirre-Chen, C., Kaprielian, Z., and Bulow, H.E. (2016). Muscle- and Skin-Derived Cues Jointly Orchestrate Patterning of Somatosensory Dendrites. *Curr Biol* 26, 2397.
  71. Yang, J., Sun, B., Huang, H., Jiang, Y., Diao, L., Chen, B., Xu, C., Wang, X., Liu, J., Jiang, W., et al. (2014). High-efficiency scarless genetic modification in *Escherichia coli* by using lambda red recombination and I-SceI cleavage. *Appl Environ Microbiol* 80, 3826-3834.
  72. Frokjaer-Jensen, C., Davis, M.W., Hopkins, C.E., Newman, B.J., Thummel, J.M., Olesen, S.P., Grunnet, M., and Jorgensen, E.M. (2008). Single-copy insertion of transgenes in *Caenorhabditis elegans*. *Nat Genet* 40, 1375-1383.
  73. Dickinson, D.J., Ward, J.D., Reiner, D.J., and Goldstein, B. (2013). Engineering the *Caenorhabditis elegans* genome using Cas9-triggered homologous recombination. *Nat Methods* 10, 1028-1034.
  74. Ward, J.D. (2015). Rapid and precise engineering of the *Caenorhabditis elegans* genome with lethal mutation co-conversion and inactivation of NHEJ repair. *Genetics* 199, 363-377.
  75. Edelstein, A., Amodaj, N., Hoover, K., Vale, R., and Stuurman, N. (2010). Computer control of microscopes using microManager. *Curr Protoc Mol Biol Chapter 14*, Unit14 20.

## Abbreviations

|             |                                                                                             |
|-------------|---------------------------------------------------------------------------------------------|
| AFF-1       | Anchor cell Fusion Failure                                                                  |
| BHK         | Baby Hamster Kidney cells                                                                   |
| BWM         | Body Wall Muscle                                                                            |
| Dpy         | Dumpy phenotype                                                                             |
| EC          | Excretory Canal cell                                                                        |
| EFF-1       | Epithelial Fusion Failure 1                                                                 |
| EFF-2       | Epithelial Fusion Failure 2                                                                 |
| FUSEXINS    | FUSion proteins essential for sexual reproduction and Exoplasmic merger of plasma membranes |
| HYP         | Hypodermis (epidermis)                                                                      |
| SM          | Somatointestinal Muscle                                                                     |
| ts          | temperature sensitive                                                                       |
| UM          | Uterine Muscle                                                                              |
| Unc         | Uncoordinate phenotype                                                                      |
| VSV         | Vesicular Stomatitis Virus                                                                  |
| VSV-G       | VSV-glycoprotein G                                                                          |
| VSVΔG       | pseudoviruses in which the glycoprotein G gene was deleted                                  |
| VSVΔG-AFF-1 | pseudovirus coated with AFF-1                                                               |
| VSVΔG-G     | pseudovirus coated with G glycoprotein                                                      |

## Acknowledgements

We thank Don Gammon for providing the *drh-1(-)* worms, Massimo Hilliard for providing *mec-4p::mCherry*, *mec-4p::EFF-1*, *odr-1p::dsRed* and *odr-1p::EFF-1* plasmids and the Caenorhabditis Genetics Center for nematode strains. We thank Andy Fire for suggesting to study syncytial BWMs and their potential phenotypes. We also thank Sharon Inberg, Yael Iosilevskii, Rosina Giordano-Santini, Dan Cassel and Sivan Korenblit for helpful discussions and for critically reading the manuscript.

## Author contributions

A.M. and B.P. conceived the project. A.M. performed all experiments unless otherwise specified. X.L. generated *myo-3p::EFF-1* Plasmid and BP2171-3 nematode strains and performed imaging of worms in Figure 5. E.M. improved viral preparation protocol. B.G. generated EFF-2 CRISPR plasmid and O.K. produced *eff-2(hy51)* worms. A.M. and B.P. analyzed data and wrote the manuscript, with input from all authors.

## Online supplemental material



### Figure S1: VSVΔG-AFF-1 and VSVΔG-G infect glia and neuron cells

**(A-B)** SDC microscope Z-stack projections of *drh-1* and *drh-1; eff-1(-)* worms injected in the pseudocoelom with 2300-4700 IU VSVΔG-G (white pins) and their heads imaged 48 h later.

**(C)** Fraction of GFP(+) worms infected with VSVΔG-G in neuron/glia cells in the specified background. Animals were injected with VSVΔG-G and analyzed as in (A-B).

**(D-E)** SDC microscope Z-stack projections of *C. elegans* cells infected with 33-240 IU VSVΔG-AFF-1 (red pins). *drh-1* or *drh-1; eff-1(-)* worms were injected in the pseudocoelom and imaged 48 h later.

**(F)** Fraction of GFP(+) worms infected with VSVΔG-AFF-1 in neuron/glia cells. Animals were analyzed as in (D-E). For (A-B) and (D-E) arrowheads point to hypodermal nuclei (HYP) and arrows point to indicated infected cell. CEPsh- Cephalic Sheath (glia), G- glia, N- neuron. Scale bar, 50 μm. In (A, B and E) yellow dashed lines outline worm's anterior body (head). In (C) and (F), bars represent average ± SEM. \*\*\*P<0.001 (Student's T- test). For VSVΔG-AFF-1: n=46,15 and 10 for *drh-1*,*drh-1;eff-1(-)* and *drh-1;aff-1(-)* respectively, and for VSVΔG-G: n= 56, 39 and 15 for *drh-1*, *drh-1;eff-1(-)* and *drh-1;aff-1(-)* respectively).



**Figure S2: VSVΔG-AFF-1 infects *eff-2(-)* worms**

**(A-B)** SDC microscope Z-stack projections of *drh-1* or *drh-1;eff-2(-)* worms injected with VSVΔG-AFF-1 (35-67 IU) and imaged 48 h later.

**(C)** Fraction of GFP(+) worms infected with VSVΔG-AFF-1. Animals were injected with VSVΔG-AFF-1 and analyzed as in (A-B). Arrowheads point to hypodermal (HYP) nuclei. Scale bar, 100 μm. In (C) bars represent average ± SEM. n=23 and 20 for *drh-1* and *drh-1;eff-2(-)* respectively. For all types of infected cells, there is no significant difference between % GFP(+) worms from *drh-1* and *drh-1;eff-2(-)* backgrounds with two-tailed Student's t-test (p<0.05).



**Figure S3. VSV $\Delta$ G-AFF-1 does not infect PVD and other sensory neurons ectopically expressing AFF-1/EFF-1**

(A-C) SDC microscope Z-stack projections of animals infected with 82-103 IU VSV $\Delta$ G-AFF-1 (red pins). (For genotypes and quantitation see Table S2). Scale bar, 100  $\mu$ m.

(A) Young adult expressing mCherry in PVD.

(B) *eff-1(ts)* adult expressing AFF-1 in PVD.

(C) *eff-1(ts)* adult expressing EFF-1 and dsRed in 12 sensory neurons.

See also Table S2 and Movie S2.



**Figure S4. Anti-VSV-G antibody blocks VSVΔG-G infection in living worms**

**(A-B)** SDC microscope Z-stack projections of *drh-1* worms injected with 4700 IU VSVΔG-G that was either not preincubated (-αG), or preincubated with αVSV-G antibody (+αG) and imaged 48 h later. Scale bar, 50 μm.

**(C)** Fraction of worms that are infected or not infected with VSVΔG-G or VSVΔG-G + αG. Animals were treated as in (A-B). n=18 and 17 animals for VSVΔG-G and VSVΔG-G+αG respectively. Fisher exact test. p\*\*\*<0.001.

## Supplementary tables

**Table S1. Phenotypes of worms with EFF-1 expressed in BWMs**

| Genotype                | <i>drh-1(-); hyEx375[myo-3p::mCherry, myo-3p::EFF-1]</i> |                           |            |
|-------------------------|----------------------------------------------------------|---------------------------|------------|
| Phenotype/ group        | <i>myo-3p::mCherry(+)</i>                                | <i>myo-3p::mCherry(-)</i> | P-value    |
| wt-like animals         | 110 ± 12 (81±3%)                                         | 60 ± 10 (87±6%)           | 0.39258    |
| Adult Unc+Dpy           | 3 ± 1 (2±1%)                                             | 0 (0%)                    | 0.05316    |
| Larval-arrested Unc+Dpy | 15 ± 2 (11±1%)                                           | 0 (0%)                    | 0.00029*** |
| Unhatched eggs          | 7 ± 2 (5±1%)                                             | 8 ± 3 (13±6%)             | 0.23501    |

Phenotype count of total progeny from 4 hermaphrodites with extrachromosomal array containing *myo-3p::EFF-1* and *myo-3p::mCherry*. Data presented as average of the progenies from 4 mothers ±SEM and the percentage out of total relevant group (e.g. *myo-3p::mCherry(+)* or *myo-3p::mCherry(-)*). P-value calculated for certain phenotype fraction (%) in *myo-3p::mCherry(+)* vs *myo-3p::mCherry(-)* groups. Two tailed Student's t-test. p<0.01\*\*\*.

**Table S2. AFF-1/EFF-1 expression in sensory neurons does not induce their infection with VSV $\Delta$ G-AFF-1**

| Strain | Genotype                                                                                                          | Description                                                                                            | total # of worms | # VSV $\Delta$ G-AFF-1-infected worms | # worms with GFP(+) cells overlapping with EFF-1/AFF-1 expressing cells |
|--------|-------------------------------------------------------------------------------------------------------------------|--------------------------------------------------------------------------------------------------------|------------------|---------------------------------------|-------------------------------------------------------------------------|
| BP2126 | <i>drh-1(tm1329); eff-1(hy21); hyEx373 [pmyo-2::GFP, pdes-2::AFF-1(pME4), KS]</i>                                 | AFF-1 expressed in PVD (Oren-Suissa et al 2017) , in <i>eff-1(ts)</i> background                       | 18               | 6                                     | 0                                                                       |
| BP2131 | <i>drh-1(tm1329); eff-1(hy21); hyEx374 [pmec-4::EFF-1, pmec-4::dsRed, podr-1::EFF-1, podr-1::dsRed, KS] line1</i> | EFF-1 expressed in 12 sensory neurons (kind gift from M. Hilliard lab), in <i>eff-1(ts)</i> background | 28               | 15                                    | 0                                                                       |
| BP2132 | <i>drh-1(tm1329); eff-1(hy21); hyEx374 [pmec-4::EFF-1, pmec-4::dsRed, podr-1::EFF-1, podr-1::dsRed, KS] line2</i> | EFF-1 expressed in 12 sensory neurons, in <i>eff-1(ts)</i> background                                  | 22               | 7                                     | 0                                                                       |
| BP2133 | <i>drh-1(tm1329); eff-1(hy21); hyEx374 [pmec-4::EFF-1, pmec-4::dsRed, podr-1::EFF-1, podr-1::dsRed, KS] line3</i> | EFF-1 expressed in 12 sensory neurons, in <i>eff-1(ts)</i> background                                  | 35               | 13                                    | 0                                                                       |

**Table S3. Reagents, strains, oligos, plasmids and software**

| REAGENT or RESOURCE                                                                                                                                                                    | SOURCE                                    | IDENTIFIER           |
|----------------------------------------------------------------------------------------------------------------------------------------------------------------------------------------|-------------------------------------------|----------------------|
| <b>Antibodies</b>                                                                                                                                                                      |                                           |                      |
| Anti-VSV-G [8G5F11] Antibody                                                                                                                                                           | Kerafast                                  | Cat#8G5F-11          |
| <b>Bacterial and Virus Strains and tissue culture cells</b>                                                                                                                            |                                           |                      |
| Recombinant Vesicular Stomatitis Virus VSVΔG                                                                                                                                           | [68]<br>Caenorhabditis<br>Genetics Center | VSVΔG                |
| <i>E. coli</i> : OP50-1                                                                                                                                                                |                                           | OP50-1               |
| BHK-21(ATCC)                                                                                                                                                                           | [69]                                      | BHK-21(ATCC)         |
| <b>Chemicals, Peptides, and Recombinant Proteins</b>                                                                                                                                   |                                           |                      |
| FUdR                                                                                                                                                                                   | Sigma                                     | Cat#F0503-1G         |
| Tetramisole                                                                                                                                                                            | Sigma                                     | Cat#L9756-5G         |
| Dulbecco's Modified Eagles Medium (DMEM) High glucose, Gibco™                                                                                                                          | Thermo Scientific                         | Cat#41965039         |
| Fugene HD                                                                                                                                                                              | Promega                                   | Cat#E2311            |
| OptiMEM                                                                                                                                                                                | Gibco                                     | Cat#31985070         |
| Dulbecco's Phosphate Buffered Saline (DPBS) With Calcium and Magnesium                                                                                                                 | Biological Industries                     | Cat#02-020-1A        |
| Certified Fetal Bovine Serum (FBS), Heat Inactivated                                                                                                                                   | Biological Industries                     | Cat#04-121-1A        |
| <b>C. elegans strains</b>                                                                                                                                                              |                                           |                      |
| <i>drh-1(tm1329) IV</i>                                                                                                                                                                | [7]                                       | <i>drh-1(tm1329)</i> |
| <i>eff-1(ok1021)II</i>                                                                                                                                                                 | [14]                                      | BP347                |
| <i>drh-1(tm1329) IV; eff-1(ok1021)II</i>                                                                                                                                               | This paper                                | BP2122               |
| Strain <i>eff-1(hy21)II</i>                                                                                                                                                            | [14, 19]                                  | BP75                 |
| <i>drh-1(tm1329) IV; eff-1(hy21)II</i>                                                                                                                                                 | This paper                                | BP2123               |
| <i>drh-1(tm1329) IV; aff-1(tm2214)II</i>                                                                                                                                               | This paper                                | BP2124               |
| <i>dziS53[F49H124p::mCherry] Unknown chromosome</i>                                                                                                                                    | [70]                                      | EB2110               |
| <i>drh-1(tm1329) IV; dziS53[F49H124p::mCherry]</i>                                                                                                                                     | This paper                                | BP2121               |
| <i>trls10 [myo-3p::MB::YFP + myo-2p::YFP + ceh-23::HcRed + unc-25::DsRed + unc-129nsp::CFP]</i>                                                                                        | Caenorhabditis<br>Genetics Center         | RP1                  |
| <i>eff-2 (hy51) II; mcls46[dlg-1::RFP;unc-119(+)]III</i>                                                                                                                               | This paper                                | BP2104               |
| <i>drh-1(tm1329) IV ; eff-2(hy51) II</i>                                                                                                                                               | This paper                                | BP2125               |
| <i>drh-1(tm1329)IV; hyEx375 [myo-3p::EFF-1, myo-3p::mCherry, KS bluescript]</i>                                                                                                        | This paper                                | BP2137               |
| <i>trls10 [myo-3p::MB::YFP + myo-2p::YFP + ceh-23::HcRed + unc-25::DsRed + unc-129nsp::CFP];hyEx375 [myo-3p::EFF-1, myo-3p::mCherry, KS bluescript]</i>                                | This paper                                | BP2171-3             |
| <i>drh-1(tm1329) IV; eff-1(hy21) II; hyEx373 [myo-2p::GFP, des-2p::AFF-1, KS bluescript]</i>                                                                                           | This paper                                | BP2126               |
| <i>drh-1(tm1329) IV; eff-1(hy21) II; hyEx374 [mec-4p::EFF-1, pmec-4::dsRed, podr-1::EFF-1, odr-1p::dsRed, KS bluescript]</i>                                                           | This paper                                | BP2131-3             |
| <b>Oligonucleotides</b>                                                                                                                                                                |                                           |                      |
| Primer: Cloning <i>myo-3p</i> from <i>myo3p::mCherry</i> Plasmid with <i>Sall</i> restriction enzyme:<br>ACGCGTCGAC AGTGATTATAGTCTGTTTTTC                                              | This paper                                | LXH60                |
| Primer: Cloning <i>myo-3p</i> from <i>myo3p::mCherry</i> Plasmid with <i>NheI</i> restriction enzyme:<br>CTAGCTAGCCATTCTAGATGGATCTAGTG                                                 | This paper                                | LXH61                |
| Oligonucleotide: Conversion oligonucleotide encoding wt <i>pha-1</i> repair fragment for CRISPR:<br><i>caaaatacgaatcgaagactcaaaaagatgctgtatgattacagatgttcatcaagttattcataatcatgatag</i> | This paper                                | BG123                |
| Primer: Addition of homology arms to <i>eff-2</i> around <i>mNeonGreen</i> for CRISPR:<br><i>ttcctgaagttcatcaaatcgaagctggcGcgattttcagaagcATGGTTCCAAGGAGAAAGAGG</i>                     | This paper                                | BG129                |
| Primer: Addition of homology arms to <i>eff-2</i> around <i>mNeonGreen</i> for CRISPR:<br><i>agattctaagtgtcagatagcttgatgatCtgCgagagaataactaGACTAGTAGGAAACAGTTATGTTTGG</i>              | This paper                                | BG130                |
| Primer: Production of sgRNA plasmid targeting <i>eff-2</i> at locus AGAAGCAGAATAAACTGGGGAGG for CRISPR: AGAAGCAGAATAAACTGGGGGTTTTAGAGCTAGAAATAGC                                       | This paper                                | BG84                 |
| Primer: Production of sgRNA plasmid targeting <i>eff-2</i> at locus AGAAGCAGAATAAACTGGGGAGG for CRISPR: CCCAGTTTATTCTGCTTCTAAACATTTAGATTGCAATTC                                        | This paper                                | BG85                 |

### Recombinant DNA

|                                                                                                |                        |                        |
|------------------------------------------------------------------------------------------------|------------------------|------------------------|
| Plasmid pCAGGS-Gind: <i>pCAGGS::VSV-G Indiana</i>                                              | [68]                   | pCAGGS-Gind            |
| Plasmid pOA20: <i>pCAGGS::aff-1::FLAG</i>                                                      | [6]                    | pOA20                  |
| Plasmid pKSI-1: pBluescript empty vector                                                       | [71]                   | Addgene plasmid #51725 |
| Plasmid pXH20: <i>myo-3p::EFF-1</i>                                                            | This paper             | pXH20                  |
| Plasmid pME1: <i>hsp16.2::EFF-1</i>                                                            | [19]                   | pME1                   |
| Plasmid pCFJ104: <i>myo-3p::mCherry</i>                                                        | [72]                   | Addgene plasmid #19328 |
| Plasmid pBG115: <i>CeU6p::eff-2_sgRNA for CRISPR</i>                                           | This paper             | pBG115                 |
| Plasmid pDD162: <i>eft-3p::Cas9 + Empty sgRNA for CRISPR</i>                                   | [73]                   | Addgene plasmid #47549 |
| Plasmid pJW1285: <i>eft-3p::Cas-9-SV40 NLSNLS::tbb-2 3'UTR + CeU6p::pha-1_sgRNA for CRISPR</i> | [74]                   | Addgene plasmid #61252 |
| Plasmid pNG1: <i>dlg-1p::Lifeact::mNeonGreen</i>                                               | Kind gift of A. Hajnal | pNG1                   |
| PCR amplicon: <i>mNeonGreen flanked by homology arms to the eff-2 gene for CRISPR</i>          | This paper             | N/A                    |
| Plasmid : <i>odr-1p::dsRed</i>                                                                 | [24]                   | odr-1p::dsRed          |
| Plasmid: <i>odr-1p::EFF-1</i>                                                                  | [24]                   | odr-1p::EFF-1          |
| Plasmid: <i>mec-4p::EFF-1</i>                                                                  | [24]                   | mec-4p::EFF-1          |
| Plasmid: <i>mec-4p::mCherry</i>                                                                | [24]                   | pmec-4::mCherry        |

### Software

|                             |                         |                                                                         |
|-----------------------------|-------------------------|-------------------------------------------------------------------------|
| Fiji                        | NIH image               |                                                                         |
| GraphPad Prism 8            | GraphPad Software, Inc. |                                                                         |
| Adobe Photoshop CS5 and CS6 | Adobe                   |                                                                         |
| MetaMorph 7.8.1.0           | Molecular Devices       | <a href="https://www.moleculardevices">https://www.moleculardevices</a> |
| Micro-Manager               | [75]                    | <a href="https://micro-manager.org">https://micro-manager.org</a>       |

## Data for movies



### Movie S1. EFF-1 ectopic expression in BWMs results in Uncoordinated and Dumpy (Unc+Dpy) phenotypes

Mixed population of worms with extrachromosomal *pmyo-3::mCherry* and *pmyo-3::EFF-1*. White arrowhead point to mCherry(+) worm that is Unc+Dpy. White arrow point to mCherry(+) worm that is wt-like. Yellow arrowhead points to a wt-like mCherry(-) worm, which left the frame within seconds. Elapsed time (seconds) indicated in top left corner.



### Movie S2. VSV $\Delta$ G-G infects PVD neuron

SDC microscope Z-stack of young adult worm injected with  $10^6$  IU VSV $\Delta$ G-G and imaged 48h later. Arrowheads, infected PVD's candelabra/menorahs arborized branches. Arrows, infected cell. BWM-Body Wall Muscle, EC-Excretory Cell, SE-Seam cell syncytium. Scale bars, 25  $\mu$ m. Note that there is a second worm (bottom, not indicated in images), also showing infected PVD branches, EC, SE and a muscle cell.
